# Supplementary material for: High Sensitivity Determination of TNF-α for Early Diagnosis of Neonatal Infections with a Novel and Reusable Electrochemical Sensor
Source: PubMed Central journal article supplement (PMC5469345; doi:10.3390/s17050992), 2017-05-10
Supplement: sensors-17-00992-s001.pdf [file sensors-17-00992-s001.pdf]

# Supplementary Materials: High Sensitivity Determination of TNF- $\alpha$ for Early Diagnosis of Neonatal Infections with a Novel and Reusable Electrochemical Sensor

Liangliang Li, Miaomiao Li, Wenwen Wang, Qian Zhang, Dongyun Liu, Xianghong Li and Hong Jiang

Table S1. Sequences of the designed oligonucleotides.

| Oligonucleotides   | Sequences                                       |
|--------------------|-------------------------------------------------|
| Capture probe (T1) | 5'-SH-TTGTCGCCGACTGCGCCATCC-3'                  |
| Aptamer (T2)       | 5'-TTTTTTTTTTTTTTTTTGGTGGATGGCGCAGTCGGCGACAA-3' |
| Signal probe (T3)  | 5'-SH-GGATGGCGCAGT-3'                           |

Table S2. Comparison of recently reported biosensors.

| Method                     | Analyte       | Line arrange                       | Detection limit | Reference |
|----------------------------|---------------|------------------------------------|-----------------|-----------|
| Fluorescence aptasensor    | TNF- $\alpha$ | 5–100 pg/mL                        |                 | [1]       |
| Electrochemical aptasensor | TNF- $\alpha$ | 1–10 <sup>3</sup> pg/mL            | 1 pg/mL         | [2]       |
| Electrochemical sensing    | TNF- $\alpha$ | 0–60 pg/mL                         | 2.07 pg/mL      | [3]       |
| Electrochemical aptasensor | TNF- $\alpha$ | 1–1 $\times$ 10 <sup>4</sup> pg/mL | 0.7 pg/mL       | This work |

1. Kongsuphol, P.; Ng, H.H.; Pursey, J.P.; Arya, S.K.; Wong, C.C.; Stulz, E.; Park, M.K. EIS-based biosensor for ultra-sensitive detection of TNF- $\alpha$  from non-diluted human serum. *Biosens. Bioelectron.* **2014**, *61*, 274–279.
2. Castro-López, V.; Elizalde, J.; Pacek, M.; Hijona, E.; Bujanda, L. A simple and portable device for the quantification of TNF- $\alpha$  in human plasma by means of on-chip magnetic bead-based proximity ligation assay. *Biosens. Bioelectron.* **2014**, *54*, 499–505.
3. Mazloum-Ardakani, M.; Hosseinzadeh, L.; Taleat, Z. Synthesis and electrocatalytic effect of Ag@Pt core-shell nanoparticles supported on reduced graphene oxide for sensitive and simple label-free electrochemical aptasensor. *Biosens. Bioelectron.* **2015**, *74*, 30–36.

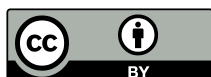

© 2017 by the authors; licensee MDPI, Basel, Switzerland. This article is an open access article distributed under the terms and conditions of the Creative Commons by Attribution (CC BY) license (<http://creativecommons.org/licenses/by/4.0/>).
